# Supplementary material
Source: PubMed Central journal article supplement (PMC4961850)
Supplement: NIHMS792607-supplement-40264_2016_428_MOESM1_ESM.pdf [file NIHMS792607-supplement-40264_2016_428_MOESM1_ESM.pdf]

Risk of Liver Injury associated with Green Tea Extract in SLIMQUICK® Weight Loss Products: results from the DILIN Prospective Study

Elizabeth X. Zheng<sup>1</sup>, Simona Rossi<sup>1</sup>, Robert J. Fontana<sup>2</sup>, Raj Vuppalanchi<sup>3</sup>, Jay H. Hoofnagle<sup>4</sup>, Ikhlas Khan<sup>5</sup>, and Victor J. Navarro<sup>1</sup> for the Drug Induced Liver Injury Network (DILIN).

<sup>1</sup>Einstein Medical Center, Philadelphia, PA; <sup>2</sup>University of Michigan School of Medicine, Ann Arbor, MI, <sup>3</sup>Indiana University School of Medicine, Indianapolis, IN; <sup>4</sup>NIDDK, National Institutes of Health, Bethesda, MD; <sup>5</sup>University of Mississippi, Oxford, MS.

Journal: Drug Safety

Address for correspondence: Victor J. Navarro, Einstein Medical Center, 5401 Old York Road, Philadelphia, PA 19141.

Email for correspondence: [navarrov@einstein.edu](mailto:navarrov@einstein.edu)

Supplementary material. Table of ingredients as listed on each product label for SLIMQUICK® products consumed.

| Patient 1                                                                                                                                                                                                                                                                                                                                                | Patient 2                                                                                                                                                                                                                                                                                                                                                                                                                                                                                                                                                          | Patient 3                                                                                                                                                                                                                                                                                                                                                                                                                                                         | Patient 4                                                                                                                                                                                                                                                                                                                                                                                                                                                                                                                                                                                                                | Patient 5                                                                                                                                                                       | Patient 6                                                                                                                                                                                                                                                                                                                                                                                    |
|----------------------------------------------------------------------------------------------------------------------------------------------------------------------------------------------------------------------------------------------------------------------------------------------------------------------------------------------------------|--------------------------------------------------------------------------------------------------------------------------------------------------------------------------------------------------------------------------------------------------------------------------------------------------------------------------------------------------------------------------------------------------------------------------------------------------------------------------------------------------------------------------------------------------------------------|-------------------------------------------------------------------------------------------------------------------------------------------------------------------------------------------------------------------------------------------------------------------------------------------------------------------------------------------------------------------------------------------------------------------------------------------------------------------|--------------------------------------------------------------------------------------------------------------------------------------------------------------------------------------------------------------------------------------------------------------------------------------------------------------------------------------------------------------------------------------------------------------------------------------------------------------------------------------------------------------------------------------------------------------------------------------------------------------------------|---------------------------------------------------------------------------------------------------------------------------------------------------------------------------------|----------------------------------------------------------------------------------------------------------------------------------------------------------------------------------------------------------------------------------------------------------------------------------------------------------------------------------------------------------------------------------------------|
| SLIMQUICK®                                                                                                                                                                                                                                                                                                                                               | SLIMQUICK® Hoodia capsules                                                                                                                                                                                                                                                                                                                                                                                                                                                                                                                                         | SLIMQUICK® capsules                                                                                                                                                                                                                                                                                                                                                                                                                                               | SLIMQUICK® Ultra capsules                                                                                                                                                                                                                                                                                                                                                                                                                                                                                                                                                                                                | SLIMQUICK® capsules                                                                                                                                                             | SLIMQUICK® powder                                                                                                                                                                                                                                                                                                                                                                            |
| Aquaplex (Uva Ursi)<br>Caffeine<br>Calcium<br>Cayenne fruit extract<br>Chromium - Polynicotinate<br>Clary sage<br>Cocoa seed extract<br>Cocoa bean extract<br>Folic acid<br>Green tea leaf extract<br>L-Carnitine<br>Proprietary herbal extract<br>Soy isoflavones<br>Vitamin B6<br>Vitamin B12<br>Vitamin D<br>Vitex agnus-castus<br>Yerba mate extract | Beta-sitosterol<br>Caffeine<br>Calcium carbonate/citrate<br>Calcium hydroxide<br>Cellulose ethers<br>Cholecalciferol<br>Clary sage extract<br>Coco bean extract<br>Cyanocobalamin<br>Dandelion leaf and root<br>Folic acid<br>French maritime pine extract<br>Gelatin<br>Green tea leaf extract<br>Horse tail<br>Magnesium stearate<br>Phosphatidylserine<br>Piper nigrum<br>Pyridoxine hydrochloride<br><i>Rhodiola rosea</i> root extract<br>South African hoodia<br>Soy isoflavones<br>Theanine<br>Uva ursi extract<br>Vitex agnus-castus<br>Yerba mate extract | Beta-sitosterol<br>Caffeine<br>Calcium<br>Cellulose ethers<br>Clary sage extract<br>Cocoa bean extract<br>Dandelion leaf and root<br>Folic acid<br>French maritime pine extract<br>Horse tail extract<br>Micronized green tea leaf extract<br>Phosphatidylserine<br>Piper nigrum<br><i>Rhodiola rosea</i> root extract<br>Soy isoflavones<br>L-Theanine<br>Uva ursi extract<br>Vitamin B6<br>Vitamin B12<br>Vitamin D<br>Vitex agnus-castus<br>Yerba mate extract | Acesulfame potassium<br>Brown seaweed<br>Caffeine<br>Croscarmellose sodium<br>Film coating (hypromellose)<br>Folate 200mcg<br>Green tea extract<br>Catechins<br>EGCG<br>Polyphenols<br>Green tea phytosome<br>Hydroxypropyl cellulose<br>Japanese knotweed extract<br>Magnesium stearate<br>Maltodextrin<br>Microcrystalline cellulose<br>Phosphatidylcholine<br>Phytosterols<br>Polyethylene glycol<br>Propylene glycol<br><i>Rhodiola rosea</i> extract<br>Silicon dioxide<br>Stearic acid<br>Soy extract<br>Titanium dioxide<br>Uva-ursi<br>Vitamin B6<br>Vitamin B12<br>Vitamin D<br>Vitamin K<br>Vitex agnus-castus | Cellulose<br>Gelatin<br><i>Ginkgo biloba</i> extract<br>Ginkgo flavone glycosides<br>Korean ginseng<br>Maltodextrin<br>Rice powder<br>Silica<br>Stearate<br>Vegetable magnesium | Asian ginseng<br>Brown seaweed<br>Caffeine<br>Calcium<br>Chaste tree extract<br>Dandelion<br>Folate<br>Green tea extract<br>Catechins<br>EGCG<br>Japanese knotweed extract<br>Juniper extract<br>L-theanine<br>Phytosterols<br><i>Rhodiola rosea</i> extract<br>South African hoodia<br>Soy extract<br>Uva-ursi<br>Vitamin B6<br>Vitamin B12<br>Vitamin D<br>Vitamin K<br>Yerba mate extract |
